# Supplementary material for: The Impact of Surface Drug Distribution on the Acoustic Behavior of DOX-Loaded Microbubbles
Source: MDPI journal article supplement (doi:10.3390/pharmaceutics13122080), 2021-12-04
Supplement: s1 [file s1]

# Supplementary Materials: The Impact of Surface Drug Distribution on the Acoustic Behavior of DOX-Loaded Microbubbles

Chia-Wei Lin, Ching-Hsiang Fan and Chih-Kuang Yeh \*

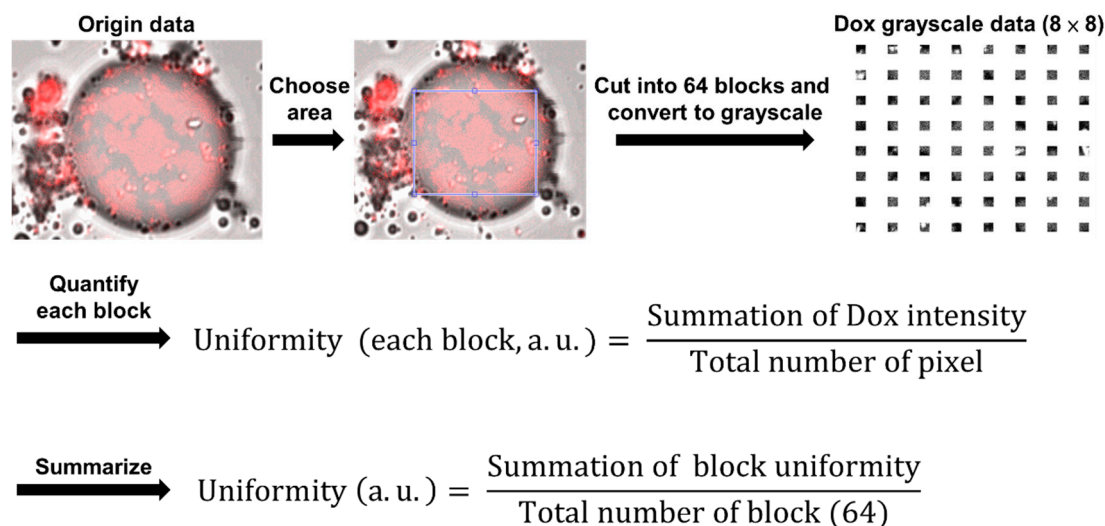

Figure S1. The flowchart of calculating DOX distribution uniformity onto the MBs shell.

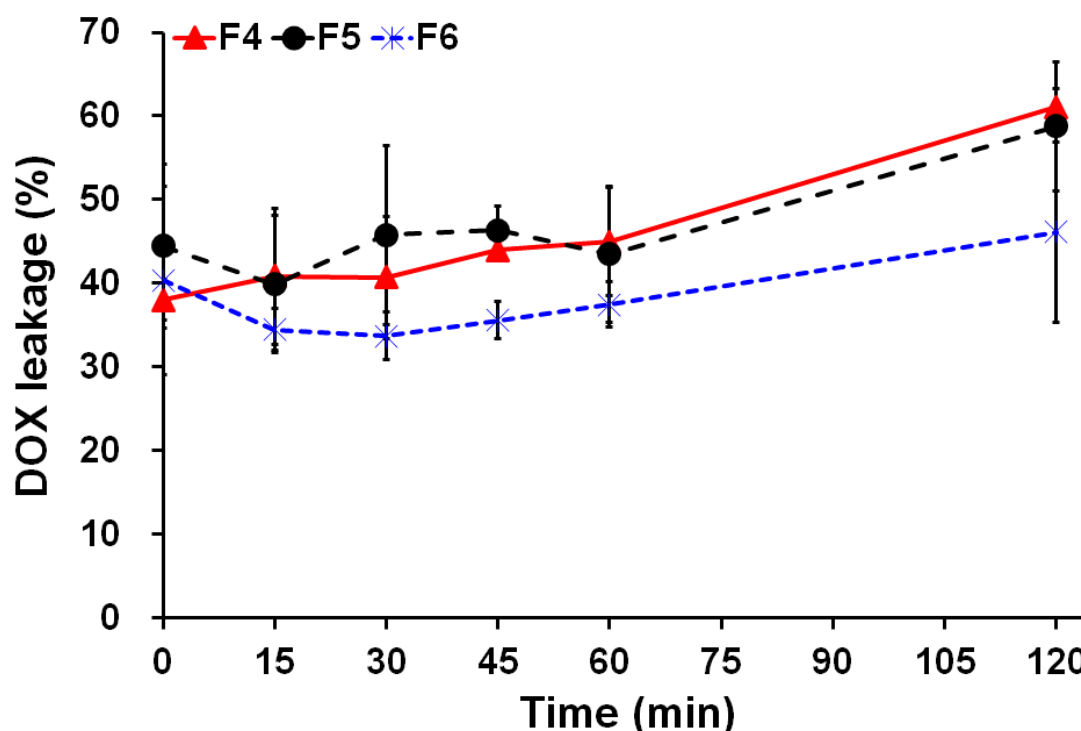

Figure S2. The DOX retention time of different MBs formulations.
